# Supplementary material for: The Impact of Endurance Training on Human Skeletal Muscle Memory, Global Isoform Expression and Novel Transcripts
Source: PubMed Central journal article supplement (PMC5033478; doi:10.1371/journal.pgen.1006294), 2016-09-22

**Individual 1**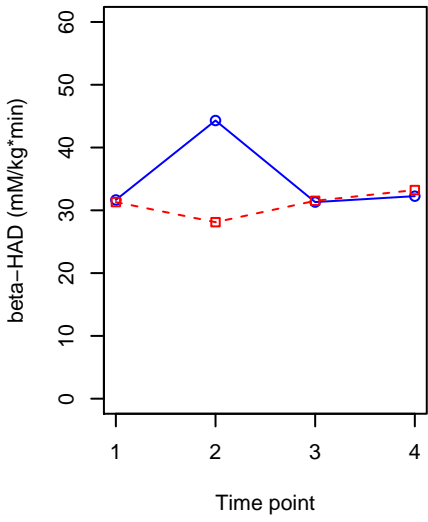**Individual 4**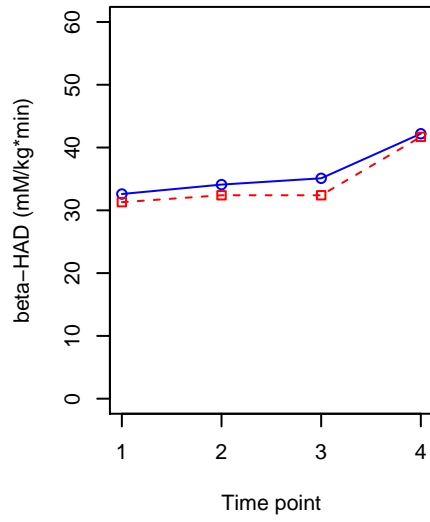**Individual 5**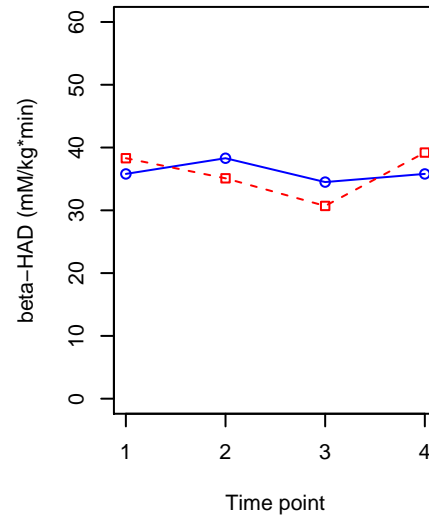**Individual 9**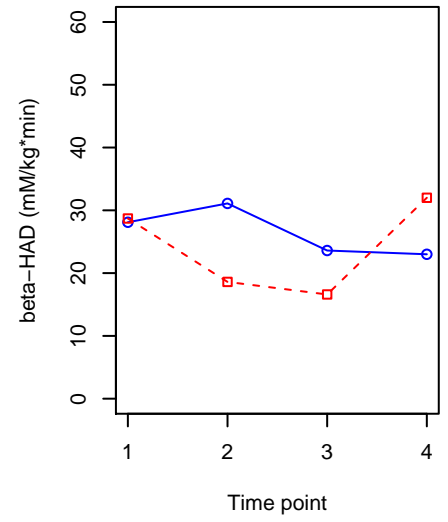**Individual 12**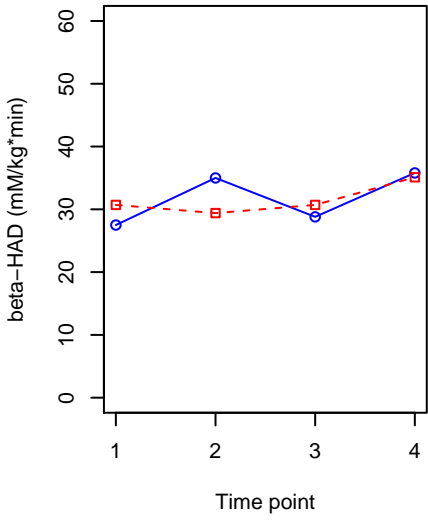**Individual 13**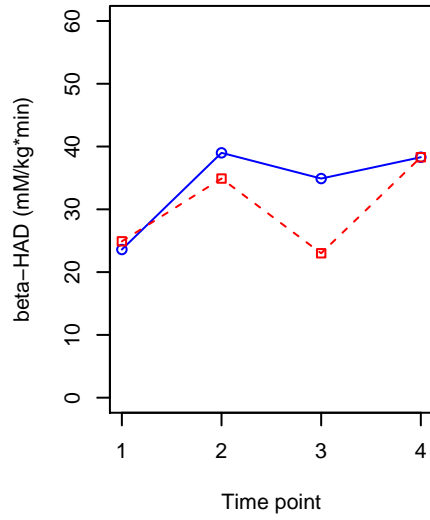**Individual 15**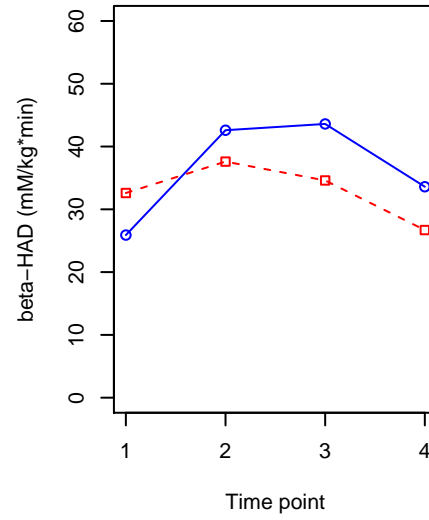**Individual 16**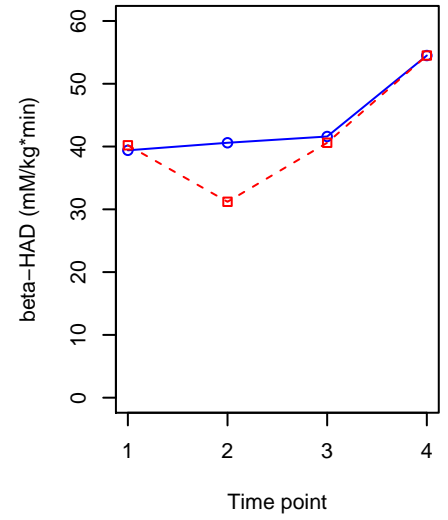**Individual 20**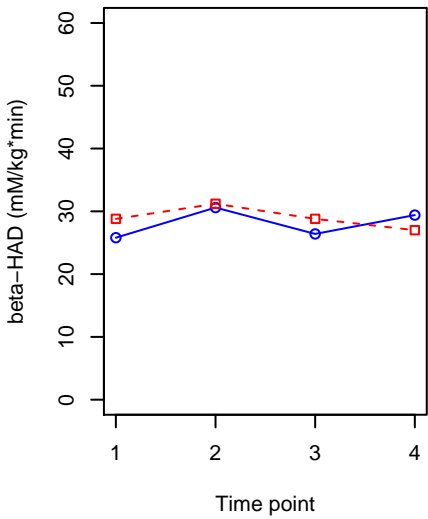**Individual 23**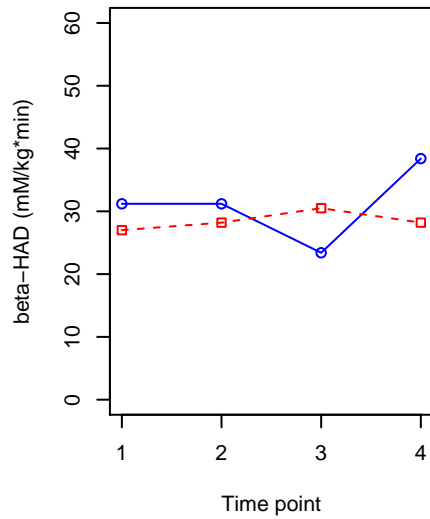**Individual 26**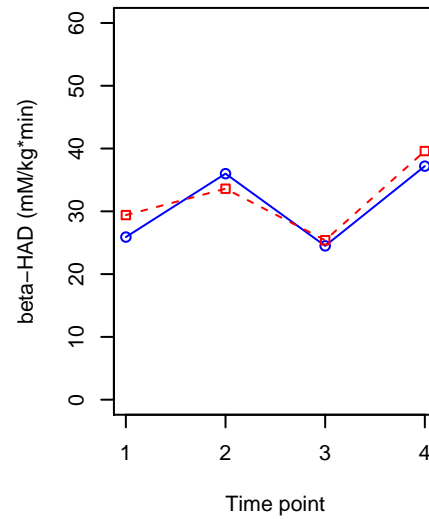**Individual 27**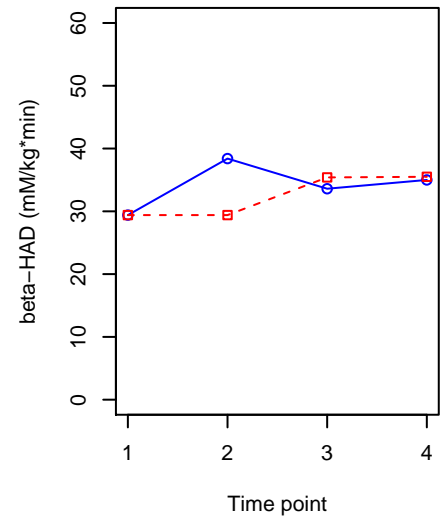

Supplement: pgen.1006294.s003.pdf [file pgen.1006294.s003.pdf]
