# Supplementary material for: The Impact of Endurance Training on Human Skeletal Muscle Memory, Global Isoform Expression and Novel Transcripts
Source: PubMed Central journal article supplement (PMC5033478; doi:10.1371/journal.pgen.1006294), 2016-09-22

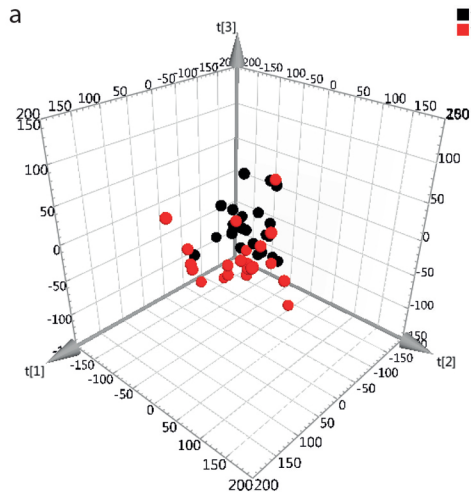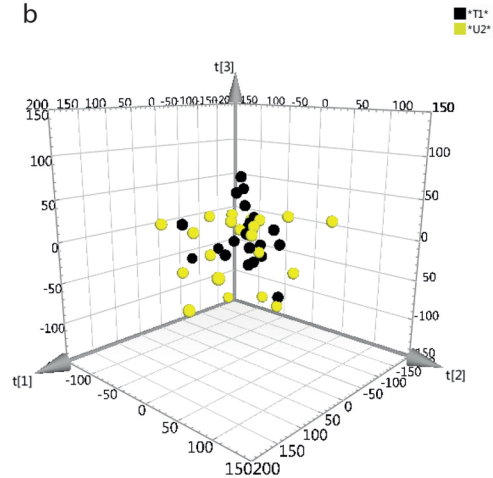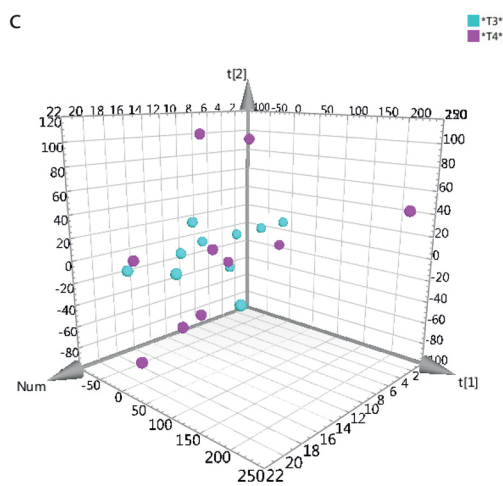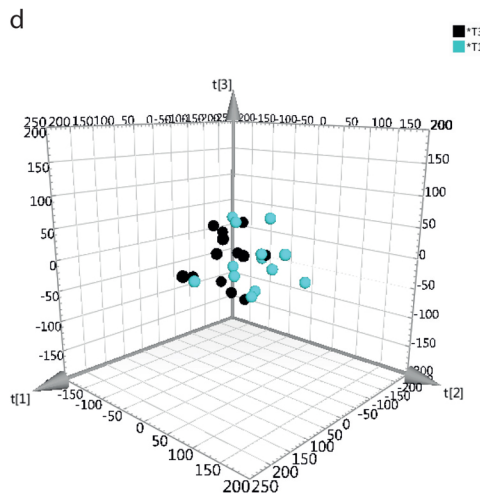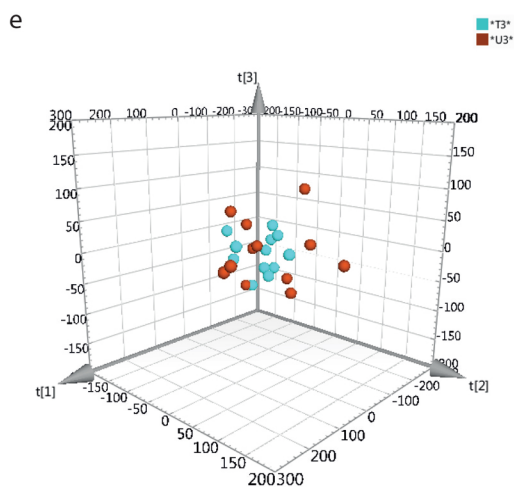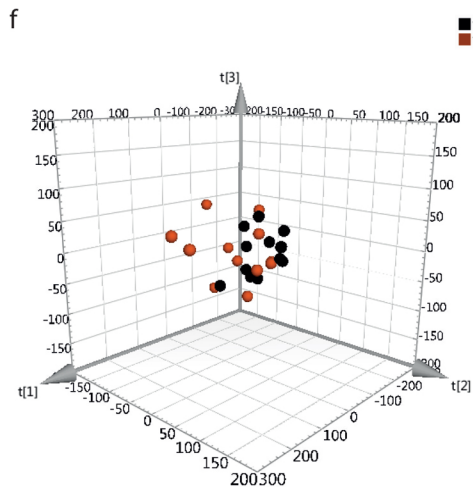

Supplement: pgen.1006294.s004.pdf [file pgen.1006294.s004.pdf]
