# Supplementary material for: The Impact of Endurance Training on Human Skeletal Muscle Memory, Global Isoform Expression and Novel Transcripts
Source: PLoS Genet. 2016 Sep 22;12(9):e1006294. doi: 10.1371/journal.pgen.1006294 (PMC5033478; doi:10.1371/journal.pgen.1006294)
Supplement: S6 Table — (XLS) [file pgen.1006294.s012.xls]

## Sheet: Summary
Novel transcript	logFC	adj.P.Val	Average read counts (T1)	Coding potential claculator	Location	No of bp	Sequence	Comment from UCSC Genome Browser	overlapping BodyMap assembled transcripts	Conserved regions UCSC	ORF Finder (SMS)	RIKEN TSS database	RIKEN enhancer database	Motif finder (www.genome.jp/tools/motif)	Description
NOVEL188	-1.57099	0.0128339	3.82609	coding	chr1:203,282,929-203,283,530	602	GCTGGAGTGCAGTGGCATGATCTCTGGTCACTGCAACCTCTGCCACCTCGGTTCAAGAGATTCTCCTGCCTCACATGGGCAAGGACTTCATGACCAAAACACAAAAAGCAATGGCAACAAAAACCAAAATAGACAAATGGGATCTAATTAAACTAAAGAGCTTCTGCACAGCGAAAGAAACTACCATCAGAGTGAACAGGCAACCTACAGAATGGGAGAAAATTTTTGCAATCTACTCATGTGACAAAGGGCTAATATCCAGAATCTACAAAGAACTCAAACAAATTTACAAGAAAAAACCCCATCAAAAAGTGGGCAAAGGATATGAACAGACACGTCTCAAAAGAAGACATTTATGCAGCCAACAGACACATAAAAAAATGCTCATTATCACTGGTC…	Human mRNAs from GenBank: KF274579, KF274577, X75546	no	Full: C, R	2			2	VWFC domain signature. (PS01208)	2Fe-2S ferredoxin-type iron-sulfur binding region signature. (PS00197)
NOVEL1463	-1.22379	0.0128339	12.2609	coding (weak)	chr3:50,706,681-50,708,607	1927	GCCCGCCTCAGCCTCCCAAAGTGCTGGGATTTACAGGCGTGAGCCACTGCACCTGTCCTTGTGTCTCTCATTAGATATTTGCTTGTGTGATTATTGGTTCAGTGTCTCTTCTCCCAACTAGATGCTAAACTCCATGAAGAGAGGCTGGGTGCAGTGGCTCGCTGTTTTTTTTTTTTTTTTTTTTTTTTGCTCTGGACCTGGCCCATAATAGGTGCTCAATAAATTTTTGGTAAATAAATGATTCAAACTTTTTACACTTCAAGATAAAAAGTATGAAAAGCTGGTGGGGATAAAGTCTCGGTTCTTTTCCTAGCCCCAGTCCCATAGCATTTCAGAGATGGGGTAGGTGGTGCTACACTACTCAACAGGCTTTTGTTTTTTAACTCATTTAACTCAAGT…	Human mRNAs from GenBank: AK093691	partly	Partly: C, R, M, Ra, D	7	Not enhancer-like - has GenBank mRNA annotation		5	EGF-like domain signature 1. (PS00022)	Integrins beta chain cysteine-rich domain signature. (PS00243)	Anaphylatoxin domain signature. (PS01177)	VWFC domain signature. (PS01208)	2Fe-2S ferredoxin-type iron-sulfur binding region signature. (PS00197)
NOVEL1335	0.730849	0.0128339	13	coding (weak)	chr21:42,651,004-42,654,447	3444	GGTTCTGGCCAAGAGAGGTACTAGATTTTTTTAATGCCGAGAAAAGTCCATGCCACAGAAGTTATTGTGTATGTCTCTAGGGAGCTTTAAGAATTTCACGTTTGAACTTTACAGCTGTTTACCAATTAAATGGCAAGCTGGAAAAATACATTTTGAGAGGGGTAGAAAGAATAAGAATATAATTAAAAGTATGCTAACAAAATAAGCAGTACATATTTTTTTAGAAAATGCAGTTTAGGCCAGGCACGGTAGCTCGTGCCTGTAATCCCAGCACTTTGGGAGGCCGAGGCAGGTGGATCACCTGAGGTCAGGAGTTTGAGACCAGCCTGGACAACATGGTGAAACCCCGTCTCTACTAAAAATACAAAAAATTAGCCAACGATGGTGATGCCTGTCTGT…	RefSeq Gene: BACE2	partly	Full: C, R Partly: M, Ra, D	13	Overlaps BACE2		8	EGF-like domain signature 1. (PS00022)	C-terminal cystine knot signature.	Anaphylatoxin domain signature. (PS01177)	Tubulin subunits alpha, beta, and gamma signature. (PS00227)	Fungal hydrophobins signature. (PS00956)	VWFC domain signature. (PS01208)	2Fe-2S ferredoxin-type iron-sulfur binding region signature. (PS00197)	Mammalian defensins signature. (PS00269)
NOVEL629	-1.24465	0.014908	8.65217	noncoding (weak)	chr13:111,514,476-111,515,829	1354	TGAATGATCTTGGCACCCTTGTTGAAAATCATTTGTCCATATATGCAAGGGTTTATTTCTGGGCTGTGTATTTTATTCCATTAATCTATAGGCATATCTTTATGCCAATACCATATTTTAAAAATTACTTTAGCTTCGAAATGTTTTGAAGTCCGAAAGTGTGAGGCCTCCAACTTTGTTCTTCCTCAAGATTGTTCTGGCAATTCAATGCCCCTTGAGATTTCATATGAATTTTAGGATGGATTTTTCTATTTCTGCAAAAATGCCATTGGGATTTGATAGGCTTTCTGATTCACTTTTGAAGTATTCTCTATATGTGGAAGGACATTAGCCCTTGGTGTAGCTTGTGACATTCATTTTTTTGTTCCATGTGGAATATACCTTGGAGCATGGTGTGAG…	Human mRNAs from GenBank: AK057970, S80450	partly	Full: C, R	5	Not enhancer-like - has GenBank mRNA annotation		5	EGF-like domain signature 1. (PS00022)	Integrins beta chain cysteine-rich domain signature. (PS00243)	Anaphylatoxin domain signature. (PS01177)	VWFC domain signature. (PS01208)	2Fe-2S ferredoxin-type iron-sulfur binding region signature. (PS00197)
NOVEL5	0.677888	0.014908	16.5652	coding (weak)	chr1:924,969-927,731	2763	GTTCTGGAGGCTGGGAAATGCAGATGAAGGTGCTGGCGTCTGATGAGCTCCTTCCTTCTGTGTCATCCCTGGACAAAGAAGACAGAGTGGGAGAGCAGGAGGGGCTGGACCCCCCTTCCATGAGGAACCCACTCCCACGATACCAGCGTTCATCTCTTCGTGAGGGCAGAGCCTCCATAAGCTAAACACCTCTTAAAGGTCCCACCTCCCAACACTTCCACATGGGGGTCAAGCTCCCGGCACATGAGCTTTTGGGGCCATATCCAAACCACAGCAGTATCCTACCTAAGAAGACTTTTGCCCAAGGTCTTTCCAAACCCAAGATCATGACAATTTACTGCTATATTTTCTTCTAAAAGTTTTATAGTTTTAGCTCTTATGTCTGTCATCCATTCTGTT…	N/A	no	Partly: R	13	Not enhancer-like - has GenBank mRNA annotation		7	EGF-like domain signature 1. (PS00022)	Integrins beta chain cysteine-rich domain signature. (PS00243)	Anaphylatoxin domain signature. (PS01177)	Thiolases active site.	VWFC domain signature. (PS01208)	2Fe-2S ferredoxin-type iron-sulfur binding region signature. (PS00197)	Mammalian defensins signature.
NOVEL1688	-1.34523	0.0166777	9.17391	noncoding (weak)	chr5:10,330,080-10,332,584	2505	GGTCAACTCTCTTTGGTTTCCTAATGTCTAAACATTTCACAATTTATGGAATTATGAAAGGATCCAGCTCCCCAGAGGATGTGAGCACATCTGAACACAATTATGCACTGCAGCCAGACAACTGTTAGCTTTCTGGGGCAAAAGACACAGAGAAAGACCAGGATAATCCTTGTGCGTGCAGCTCAGATTTGGCCCCTGTCGCCACACGCTGCCAAGCCTGTCACATTCTGGCAATAAGGAGCAATGCTTGGATGGGGACCAGGACCATGCTGACATCTGACCACCTCTGCAGTCTGGGCGAATTCCAAGAAATCCCTCAGAAGAAAGTGCCATGCAGAAATATCCTGGCGGGGGAACTGCCCACACAGCTGTGCCAGTTATTCACCCTCGCCAGATTCT…	N/A	no	Full: C, R, D Partly: M, Ra	11	Enhancer-like but non-SM specific		7	EGF-like domain signature 1. (PS00022)	Integrins beta chain cysteine-rich domain signature. (PS00243)	C-terminal cystine knot signature. (PS01185)	Anaphylatoxin domain signature. (PS01177)	Fungal hydrophobins signature.	VWFC domain signature. (PS01208)	2Fe-2S ferredoxin-type iron-sulfur binding region signature. (PS00197)
NOVEL2175	-1.03448	0.0166777	87.2609	noncoding (weak)	chr8:79,528,923-79,538,540	9618	TATCAAGTAAAAAGTAGTGTAATGAACTTCCATGTAGCCATTATCCAGCTCCAACATTCTCGGACAATCTTTTTTTGTCTATATTCCCACAGGAAGTATAACCCACTGGATTACTTTGAGGACGATCCAAACATCCTATCATTTTAGTTTTAAATACTTCGGTTTGCATCTCTGAAATAGTGTTTTGCCCATAATCATAATAGCATTATTATAACTTAAAGAAAGAATAATGCCTTATTATAAAATAGTCACCCTTCCAGTTTGCAATTGTCTCATAAGTGACTATATAGTTAGTTGGTTAAATCTGGGTTCATAATAGATCCATACGCTGTAATTATTATTAAGTCCCTTGAAACTCTTTTTATTATTAGGTTGGTGCAAAAGTAATTGCAGCTTTTG…	N/A	partly	Full: C Partly R, M	36			6	EGF-like domain signature 1. (PS00022)	Anaphylatoxin domain signature. (PS01177)	I-superfamily conotoxin signature. (PS60019)	Thiolases active site. (PS00099)	VWFC domain signature. (PS01208)	2Fe-2S ferredoxin-type iron-sulfur binding region signature. (PS00197)
NOVEL1072	0.711729	0.0166777	11	noncoding	chr2:49,456,766-49,457,039	274	TGTGTAGTGTAGTACGATGTCTAGTGATGAGTTTGCTAATACAATGCCGGTTAGGCCACCCACAGTGAAGAGAAAAATGAATCCCAGGGCTCAGAGCACTGCAGCAGATCACTTCATATTGCTTCCGTGGAGTGTAGCGAGTCAGCTAAATACTTTGACGCCGGTGGGGATAGCGATGATTATGGTAGCGGAGGTGAAATAAGCTCGTGTGTCTACGTCCATTCCTACTGTAAATATATGGTGTGCTCACACAATAAACCCTAGGAAACCAATG	N/A	yes					2	EGF-like domain signature 1. (PS00022)	2Fe-2S ferredoxin-type iron-sulfur binding region signature. (PS00197)
NOVEL1948	-0.580445	0.0192604	177.609	noncoding	chr6:141,724,706-141,729,312	4607	GGTTGAACAAGCCCACCTGACCAAGAGAGGGAAGCACGCTAACTGTTTTCAGTTTGGACACTCTTGGGGGCTTTTTAGTAATTGCATGTGTTTCTGAGCAAGTGAGTGTCTTTTGTGGGTACCAGACAACAGGATTGCTCCTCTCAACTAGGGACAGTCTGAAGAATTTTGGTGTGCAAATTCATCAAGCTCACCCCATGGAAAGAGGAAGCTCCGCTGTTTCAGTTTGGACACTCTTGGGGTTTGTTGGTTGCTGCAGCACTTGGATTGTATTTTGGTGATTGTTTGTGTATGTCAATATAGCCATGGGAAGTAAGAATTTGATAAGCTGATAATCTTATGTAATACTGTTTGGCCTCATATCTTTGAATCTGGATAAGTTTGGCCTCTCCATGTGCC…	N/A	partly	Full:C, R	12	Enhancer-like		3	EGF-like domain signature 1.	Thiolases active site.	2Fe-2S ferredoxin-type iron-sulfur binding region signature.
NOVEL1686	-1.42241	0.0196207	6.91304	coding (weak)	chr5:10,314,797-10,316,503	1707	CAGAAGGTGGACTGTGGCTGTCTGCTGGCTGGCCTGTACTGATTCTCACCTCTAGCAGTCATACCCTTCAGTAGTCCCCAACCCCGCTGTGCCTCATCGCACCATAGTTGGTCTGTGAGACCAATGACATGCAACAGAAGTAATGTGCTATGGTTTGAATGTTTGTCCCTGCCAAAGCTCACGTTGAAATTTAATCCTAAATGTGGCAGTGCTGAGAGGTGGGGCCTTTAGGAGGTGATTGGGTCATGAGGGCAAAATGGATCAATCCATTCATGGATTCATGAATTTATCTTGGGAGTGAAACTGGTGGCTTTATAAGAAGAGGAAGATCTACCTGAGCTAGCACGCTCAGTCTCCCTGCCGCCTGCTGCCCTGCACTCCTTGGGACTCTGCAGGCTC…	Human ESTs that have been spliced BE730940	no	Full: C, R	7	Enhancer-like (CMBL)		7	EGF-like domain signature 1.	Integrins beta chain cysteine-rich domain signature.	C-terminal cystine knot signature.	Anaphylatoxin domain signature.	Thiolases active site.	VWFC domain signature.	2Fe-2S ferredoxin-type iron-sulfur binding region signature.
NOVEL1382	1.20228	0.0196207	4.65217	noncoding (weak)	chr22:28,070,090-28,070,354	265	GCAAAAGGACGTGTGTGGCAGTGACAGCAGCGGGAGCCCCGGGGGGGGCCCCCCGGGGACACGTGTCCACCACCTGGGCTCCCGTGCCCGCTGAGCTCTGGGAGGCAGTGGCTGCTAAAATACAGATTCCTAGGCCCCAGACCATCATCCTGAAGCCAAATTGCCAGAGTCAGGCCCAGGACTCTAGAGTTTCTTTGAGGGTCTCCCAGACACTTCTGGTGAGCAGCCAGGCTTGGAAACTCCTGTGCAGCCCACCCAGCCCCAG	Human ESTs that have been spliced F26259	no	Full: R, Partly: C, M, Ra, D	1			4	EGF-like domain signature 1.	C-terminal cystine knot signature.	Anaphylatoxin domain signature.	VWFC domain signature.
NOVEL2106	-0.918565	0.0196207	21.3043	coding (weak)	chr7:123,311,643-123,315,063	3421	TCTACCCCTACAATTCTAAACCCACACACCCAAATGGAAAAGCACCTCAGACACAATATATTTAAAATTGAACTCCTCCTCTTCTTCCAAAACCTTCTGCTATATCCCACAGTCCTGCATATCACTCACTGGACAGTCTTCTCTATCCCTATCCCTCCTGTCTTCCCACTGGACAGTTACCTGTCTTTGATTTCCACACACTCAGCATTGATGAGGAGTTTTAACAGAGCGCTTGCCACATGAGCTGTTTAGGGACAGTAGCCATGTCTGATCTCGTTAGTGCTCCAGGGCCAAATACATTTAATAAATGTTTGTTGAATAAATGAATGACTCCAAGAAAATGCACACCACTCACATGGTGGTTTTTATGATAATGGGATTTTGTATTTCTGATATTGT…	Human mRNAs from GenBank: AF087995	partly	Full: C, R Partly: M, Ra, D	13			4	EGF-like domain signature 1.	Anaphylatoxin domain signature.	VWFC domain signature.	2Fe-2S ferredoxin-type iron-sulfur binding region signature.
NOVEL2413	-0.881957	0.0196207	14.0435	coding (weak)	chrX:137,696,914-137,699,450	2537	TATTTGTAATAGCCCAAAAGTAGAAAGAACACAAATGTTGTTCAACAGGTGAATAGTTAAACTATGGCACATCTCTACCATGGAATACTACACAGAAATTAAACATATTGCATTACTGATATACACAACAGTTTGGATGCATCTCAAGGGAATTGTGCTGAGTGACAAAAGCCAATCTCTATGTGTTATATACTGTATGATGACATTTATATAACAATTCTGAAATAATAAAATTATAAGGATGAAGAACAGATTAGTGTTTACTAGCTTTTATGGGTGAAAAAGGATGACAGGGAGATGTTTATAAAGGAATAGCACAAGGGATCTTAGTGGTGACGGAACAGTTCCATATCTTGATCATTGTAGTGGTTACCCAAATATACACATGTGGTAAAATTG…	RefSeq Gene: LINC00889	partly	Full: C, R Partly: D	9			7	EGF-like domain signature 1.	Janus-faced atracotoxin (J-ACTX) family signature.	Anaphylatoxin domain signature.	Thiolases active site.	VWFC domain signature.	2Fe-2S ferredoxin-type iron-sulfur binding region signature.	Mammalian defensins signature.
NOVEL1663	-1.16365	0.0205587	28.6522	noncoding	chr4:186,419,228-186,420,365	1138	TTACTTCATAGGTGCTCAATAAATATTTATTGAGTGCTCTCCAGAATGAATAGACACCTGAGAGAATTATCTTGAAATAATCATATAGATCAGGCAAATGGTTTATTTACTTGAATTATCTGAATGCCTTCATTCTTTCTTCAGTTTTCTTTTTTTATGCTTAAGATACAACTGGAACAGCATAAATTTTAAAAAGAACATTAAGTCACCACGACACGATAATAGAGAGTAATGGTTACAAGTAGCAGTTTTTCTTAGGACTGAAATCAAATCTGTTGAAAGGACAACTTGGCAGACTTTTGCAACTAAAGATGTTGGTAGAAGAAATGTAAAGCTCCATTCTACTTAGCTTGGAGTGTTCCCATGCTGGGCAATTGGCAAGCTTTATCATCTGTAGAG…	Human ESTs that have been spliced BE268286	yes	Full: C, R, M, D Partly Ra	2			1	EGF-like domain signature 1.
NOVEL27	0.646644	0.0205587	9.56522	coding (weak)	chr1:23,751,342-23,752,584	1243	CAAGGACTTGCCCGGGCACTGATTGCCCGCGCCGGCCGATCGGGCCTCAGGGGAGGGACGAGGCTGAGAGAGGGGACCCTCCAACTCCGGCCCTTCCAGGGGCGCCGGGGGACCGAAGAGAGATTTGGGAAGGAGGGCTCTCTGGCGAGCTGGGAGGCTGTGACCTGGCCACAGGCGGCGGTCGCGGCGCGGAGGGCGCCCGAGGGTGTCCCAGGGGCCCTGGGAAGCGTTCTGGGCTCCCGCGTCTCTGCACCGTTGCATCTCAAAGCGGGAGGACACAGTTCCGCGCCTATGCCCAAGTGGAGGCAACTCGGTGCGCTCGAATCCCGTGTGTGTGTGTGTGTGTGTGTGTGTGTGTGTGTGTGTGTGTGTGTGTAGATCACTAAATCCAGCTCTGCT…	N/A	no	Full: C Partly:R, M, Ra, D	4	Enhancer-like (TCEA3), non-SM specific		6	EGF-like domain signature 1.	Integrins beta chain cysteine-rich domain signature.	Anaphylatoxin domain signature.	VWFC domain signature.	2Fe-2S ferredoxin-type iron-sulfur binding region signature.	Mammalian defensins signature.
NOVEL909	-1.07848	0.0239663	17.3043	coding (weak)	chr18:11,190,835-11,193,580	2746	TCAAAGGATTATTCCACTGATGAAAAGAAAATGTTTACTATATGTATATATATAATATGATTATGTATGTATACATATACACATGTGTGTATATATTTGATAATTTGATGGTTACTTTTCTCTCTTGGAAGTTAACCTATAAAGTGTGTTATGCTATACATGCACACAGACACAGACACACACACACACCACACACACACACACACACACACACACAACTTCATAATTGCTCTAGATACCCGAATTCAAGCAAGAAAGTAAGAAAAATAGTGATGACTTTAGATTTGCCTTTGGGAAAAACATACCATATGTTTATAAAAAAGGTCCAAACTGCTGGCAGATTTAAGGAGGGAAAGAGAGTTGACTTTTTTGCCTGTCCATGTGCAAATCCTCTTGGCA…	N/A	partly	Full: C Partly: R, M, Ra, D	13			6	EGF-like domain signature 1.	Anaphylatoxin domain signature.	Thiolases active site.	VWFC domain signature.	2Fe-2S ferredoxin-type iron-sulfur binding region signature.	Mammalian defensins signature.
NOVEL473	0.671097	0.0264069	12.5652	coding (weak)	chr12:32,148,185-32,151,464	3280	CCTGCCTTGGCCTCCCAAAGTGCTGGGATTACAGGTATGAGCCACTGCACCTGGCCAATTTTGGTCTTGTGTGACTATCCTAGAATGTACTAGGTTTGTGTAAACCTAGATGGTACAGGTTGAATATCCTAAATCTAAAATCCAGAGCTGGGCACAGTGGCTCATGCCCGTAAACCCCAGCACTTTGGGAGGCCAAGGCGGGCAGACCACCTGAGGTCAGGAGTTCCAAGACCAGCCTGACCAACATGGTGAAACCCCATCTCTACTAAAAATACACAATTAGCATGGTGTGGTGGCAGATCCCTGTAATCCCAGCTACTTAGGAGGTTGACGCAAGAGAATTGGTTGAACCCCGGAGGCGGAGGTTGCAGCGAGTCGAGATCACGCCATTGCACTCCA…	Human ESTs that have been spliced AI653813	no	Full: C, R	9			6	EGF-like domain signature 1.	Anaphylatoxin domain signature.	Thiolases active site.	Tubulin subunits alpha, beta, and gamma signature.	VWFC domain signature.	2Fe-2S ferredoxin-type iron-sulfur binding region signature.
NOVEL1575	-1.63646	0.0270986	31.087	noncoding	chr4:15,883,856-15,886,706	2851	GGATAATGGCCCCAAGGGTGGAATCGCATCTGGTAGCTGTTTCTTCTCAGCCCAGTGAGCGGACACCAGATCGATCCTTCCTCCCCGAATGCTGCCAGAGAGACTGGAGAATCATGTAGGATGGAAGGTCAGCAGAAACGCAAGGGGCCGTTATGATGAGGACTGAGAGAGGCATCCCGTACCAGGCAGCAGGATGCTCCATTGGAATAGCACAGCAGGACAGGTGTGTGGTAGCTGAATCATGCCCCACAGGAGATCCAGGCCCTAATCCCTGGAATGTATGAATGATAACTTTGTTTGGCAAAATAAGCTTGGCACAAGTGCTTAAATTAAGGATTTTGAGATGGGAGAGTATCCTGGATCATCCAGGTGGGCCCTAAATATAATCACAAGTGTCCT…	Human ESTs that have been spliced BI767264	partly	Full: C Partly: R	14	Enhancer-like		6	EGF-like domain signature 1.	Anaphylatoxin domain signature.	Insulin-like growth factor-binding protein (IGFBP) N-terminal domain signature	Thiolases active site.	VWFC domain signature.	2Fe-2S ferredoxin-type iron-sulfur binding region signature.
NOVEL4	0.823093	0.0270986	6.3913	noncoding	chr1:917,725-918,046	322	CCGTGCCTCCGCCACCCGCGGTGAAACCTCAGACCTGCCCTCCCTGCCGCCCCTGGAATGTTCCTGGCCTGCTTCTGAGATGGCCTCTGTGTCCCGGCCAGGGCTTGTGCCTCCCGGTCCTGACCTCTGGGGCTCATGTGAGGGTGAGTGACGCCAGGGAGCGTCAGCGTCAGAGCCCCCACGCCTGGCTCCGCTCAGCTGCACCCTCCAGGCCGTCCTGACCTTGGGGTTCACGGTGCCCATTCCCAGGCAGGTTCCGAGCCAGAGGGGACAAGAGGACAGGGCGAGGGATCCAACAATAAACATCCGATCAAACAGGCAG	N/A	no	Full: C, R, D, Z Partly: M, Ra	1	Enhancer-like (C1ORF170)		7	EGF-like domain signature 1.	Integrins beta chain cysteine-rich domain signature.	C-terminal cystine knot signature.	Anaphylatoxin domain signature.	Thiolases active site.	Tubulin subunits alpha, beta, and gamma signature.	VWFC domain signature.
NOVEL2106	-0.988452	0.0310094	21.3043	coding (weak)	chr7:123,311,643-123,315,063	3421	TCTACCCCTACAATTCTAAACCCACACACCCAAATGGAAAAGCACCTCAGACACAATATATTTAAAATTGAACTCCTCCTCTTCTTCCAAAACCTTCTGCTATATCCCACAGTCCTGCATATCACTCACTGGACAGTCTTCTCTATCCCTATCCCTCCTGTCTTCCCACTGGACAGTTACCTGTCTTTGATTTCCACACACTCAGCATTGATGAGGAGTTTTAACAGAGCGCTTGCCACATGAGCTGTTTAGGGACAGTAGCCATGTCTGATCTCGTTAGTGCTCCAGGGCCAAATACATTTAATAAATGTTTGTTGAATAAATGAATGACTCCAAGAAAATGCACACCACTCACATGGTGGTTTTTATGATAATGGGATTTTGTATTTCTGATATTGT…	N/A	partly					4	EGF-like domain signature 1.	Anaphylatoxin domain signature.	VWFC domain signature.	2Fe-2S ferredoxin-type iron-sulfur binding region signature.
NOVEL1450	-0.611585	0.0327734	31.3913	coding (weak)	chr3:46,555,187-46,556,521	1335	CCTGTAATACACTTCTTTTAGATGTCAATGGGATTCCCAAGTGGAGCTGCCCTATAGAGGAGAAACCAGAAACAGGTGCCAATATTAAAGGTCAAAGCTGGAGTAAGAAACATAAGTCATCTATGTATCAAAACCAAATCCTCGTTTTAAAAAGGATTAGTACCCTCAGTACAATTATAAAGCACTAAACTTTGGCTCAAATACAGAATGGTCTTTGGGTGAAAACATAATCCATTCTGAGCCAATTAGAATACATACCTCAGTAAGCAATAGGATTGGATATCCACTTCCTCAACCTTTCCCTTTTAAAGTTTACAAAACTGACCATTTTGTGAACGTCTGCTCTAACGACCCAGATAAACACCAGCCAAGCTTTCAGAAGGAGGCATCTCTAAGCCA…	Sequences in articles: Sabeti2005, Human mRNAs from GenBank: DQ892102, DQ895296	yes	Full: C, R Partly: D	4			4	EGF-like domain signature 1.	Anaphylatoxin domain signature.	Thiolases active site.	VWFC domain signature.
NOVEL1307	-1.53232	0.0401288	101.478	coding	chr20:61,192,866-61,198,737	5872	GATTTGCCCAGTGGACTCCTCCCCGTGGGATCCGATGTCACGTGGGCGTGTCCTGCCTGTGTTGGCTGCGAGCGTTTCCTCCTGACTCACACCCAGTAGAGCTGCAGCCTCCACTGGGCGAGGCGGCCTTGGAAAAGGAGGCGGGTGCTGTCCTGCTGTGGAGGGGCTGGCGGGAGGTGGGTTCTGCAGGGTCAGTCCCGGGAGGTGCAGCTGTGGAGGGGCTGCTGACCCCCAGGATCCCCGAGGCCGCCTGCTCCCGAGAGGCCGCCCCACACGCCAGCCTCAGCGTCGGGAGAGGAAGCCCCACATGCCAGCCTCAAGGTCAGGAGAGGAAGCCCCACATGCCAGCCTCAAGGTCGGGAGAGGGCGCCCCACATGCCAGCCTCAGCGTCGGGAGAG…	Human ESTs that have been spliced DA028946 etc.	no	Partly: C, R	21	Enhancer-like	Enhancer-like	11	EGF-like domain signature 1.	Integrins beta chain cysteine-rich domain signature.	C-terminal cystine knot signature.	Anaphylatoxin domain signature.	I-superfamily conotoxin signature.	Insulin-like growth factor-binding protein (IGFBP) N-terminal domain signature.	Thiolases active site.	Tubulin subunits alpha, beta, and gamma signature.	VWFC domain signature.	2Fe-2S ferredoxin-type iron-sulfur binding region signature.	Mammalian defensins signature.
NOVEL1258	-1.25239	0.0401288	5.65217	noncoding	chr20:1,399,556-1,400,476	921	CAATTCATGTCTTCATTCAATAAATATTATTCTTTACTTCATATGTTCCACGCTCTGGTTGTTTTGTGGGGAGCAAAAGAGAAGTTCCCATTTCTGTTTATGTTAGAAACAAAACAAGACAAAAAACAAATTAACAAGCAAATACATACTGATTATAAAATAATGTGATGTGAAGAAAAAAACTGCTAAGAAAGAATAATGAGGTAGGAGGGGGCTACTTGAGATCAGGTGGTCACGCTGAGAGTTGAGAGTGGAAAGGAGCAGCTGGGAAGGTGTCTGGGAGAAGGCTGTTCTAGGAGGCAGAAACAACATGAACCAGAAGCTTGAGGAAAGACTGTTCACTAGAGGAACAGAAGGAAAACCAGGGAGGCTGGACAAGAACAGGGATGGGAAGCTGAC…	Human ESTs that have been spliced HY009009	partly	Full: C, R	6			3	EGF-like domain signature 1.	Thiolases active site.	2Fe-2S ferredoxin-type iron-sulfur binding region signature.
NOVEL1947	-0.717902	0.0401288	12.4348	noncoding	chr6:141,724,309-141,724,626	318	CTAATCTCCCGTCTCCTCAGCTGCAGCACCAGGTTAAAGCCTTCTTCCCTGGCAATACTCATTGTCTCAGTGATTGGCAAGACCTAGACCAAACCCCTGGCATTTTGGTACGCTGATCTGGAATGCATTGCTTGTGGCTTTGCTGTCTGCTGCAGGCTGGAGGAGCTTAAAAGCCTTTCTAAGTAGCTGCCTGTCCTTTTAGGACTGGATGTAGGTTTCTGCCTCTCTTTTTGGCCCTGGCATTGCTGGCCCCAACCACATTCCTGATTGCCCGGGAAGAACAGCCTTTGAAATTCAACATCTGCTTCTGGGTAGTTG	N/A	no	Full: C, R	1	Enhancer-like		1	EGF-like domain signature 1.
NOVEL1037	0.681887	0.0401288	10.913	noncoding (weak)	chr2:27,961,139-27,962,389	1251	GCACCCTCTTTTTTTTCCCTCCCTTCTCCCCATCCCATGATGGAGCATTCTGCGCCAAAAGCCAGCTTTCACTCTGCAGGGCAACGTGGAGAGGGATGAAAAGCCTAGACCCCTTAGCACGGTCACCTGAACACAAGCTGAGTGTGGCGTATCAAGTGGAAGCCCAGGAGGGAAGAGCCAGTGGCACAGTTATCTCCCACCACCCGACATGCTCCGGCCGCCAGCTCTGGTCTGACCGACGCTTCGGATGAAGAACTCCAAGCAGCCCCCTATTCGTACTGTTTTCCTCAGTGAACTCCCAGGGATCACCTGCTTTTTATGTGTGACGAATGTGGTCAGTTTTGTTTGCTTTTGACAGCTCATTATGGGTCCATGAGGTCAGAGTCCTGGCTGAAAGGC…	N/A	no	Full: C, R Partly: M, Ra, D	6	Enhancer-like but non-SM specific	Enhancer-like but non-SM specific	4	EGF-like domain signature 1.	C-terminal cystine knot signature.	VWFC domain signature.	2Fe-2S ferredoxin-type iron-sulfur binding region signature.
NOVEL619	0.453783	0.0401288	16.1304	coding (weak)	chr13:100,737,624-100,738,981	1358	GGTTTCACCGTGTTAGCCAGGATGGCCTCGATCTCCTGACCTCGTGATCCGCCCATCTCGGCCTCCCAAAGTGCTGGGATTACAGGCGTGAGCCACTGCGCCCGGACTAATTTTTGTATTTTTAGTAGAGACAGGGTTTCCCCATGTTGGCCAGGCTGGTCTCAAACTCCTGCCCTAAGGTGATCTGCTCACCTGGGACTCTCAAAGTGCTGGGGTGAGAGGTGTGAGCCACCGTGCCTGGCCATTCTTGATATTGTTAATGTATGTTTTTATTCTGAAAAAGGTTTTTTGTTGTTTATTTATTTATTTTTGAGACAGAGTCTCACTCTGTTGCCCAGGCTGGAGTGCACTGGTACAATCTTGGTTCACTGCAACCTCCGCCTCCTGGCTTGAAGATTT…	Human ESTs that have been spliced CX784348 etc.	partly	Full: C Partly R, D	5		Not enhancer-like - has GenBank mRNA annotation	6	EGF-like domain signature 1.	C-terminal cystine knot signature.	Anaphylatoxin domain signature.	Tubulin subunits alpha, beta, and gamma signature.	VWFC domain signature.	2Fe-2S ferredoxin-type iron-sulfur binding region signature.
NOVEL1574	-1.37893	0.0421241	4.04348	noncoding	chr4:15,872,802-15,873,067	266	CAAAATTTATACCCTGATGTCCTAACCCCAGTACCTCAGAATGTGACTATAAAGAGGTAATTAAATTAAAATGAGGTCATTAAGGTGGACCCTATTTCAATTTTACTGGTGTGCTTAGAAGAAGAGGAGATTAGGACAGACTCCAACAGAGGAAAGACCACGTGAAGACACAGGGAGAAGGCGCCGTCTACAAGCTAAGGAGAGAAGCCTCAGAATGAAGCCAACCCTATGGACATCTTGATCTTGGACATCCGGCCTCCAGAATT	Human ESTs that have been spliced BI767264	yes	Full: C, R, D	1			1	Thiolases active site.
NOVEL297	-0.690433	0.0421241	62	coding (weak)	chr10:50,538,564-50,543,544	4981	AATACTCAACCAGTACTTCGTAAGTGCGGTCCCTGCAGCAGCAGCCTCCACATCACCAGGGGCTTGTGAGAAGTCCAGAATCCCTATCTCCATCTTCACAAGCTTCCCTGGGTGGTTGATCCATTTGTGCATTGAATTCTAAGTGCTGTCAGTCTCTGCTTAGCCTGTATAAATTTTGGGGAGGTGCACTGGATGTCTTCATGTCTCCACAGCAATGTCTTGTGCAAAGGAAGAGAGCAGCACATCTAGGTGGGGGAGTTGCAGGGAGATGATTGACACTCAATGTGAGAAAGGCATCTCTGAGGACGAGCATCATCTTTTTTTTTTTTTTTATTTGAGACAGAGTCTCACTCTGTTGCCCAGGCTGGAGTGCAGTGGCTCGATCTCAGCTCACTGCTA…	Genome-Wide Association Studies in an Isolated Founder Population from the Pacific Island of Kosrae	yes	Full: C, R Partly: M, Ra, D	19			11	EGF-like domain signature 1.	Integrins beta chain cysteine-rich domain signature.	C-terminal cystine knot signature.	Anaphylatoxin domain signature.	Insulin-like growth factor-binding protein (IGFBP) N-terminal domain signature.	Thiolases active site.	Tubulin subunits alpha, beta, and gamma signature.	VWFC domain signature.	4Fe-4S ferredoxin-type iron-sulfur binding region signature.	2Fe-2S ferredoxin-type iron-sulfur binding region signature.	Mammalian defensins signature.
NOVEL2116	-0.668135	0.0453318	12.4348	coding (weak)	chr7:128,271,145-128,273,827	2683	GGAACTAATAAATGTCCATGAAATCTTCACAATTTATGTTCTTCTGCTGT GGCTTCAGCCGGTCCCTCTGTTCAGGGTCCCTGACTTCCCGCAACACGTT TCTCTCTACTCACAGACTTCTGACCAAATGTGTGTGCGGAGTTTCTACAC CAATTCTCCAACTCTCTGGATACCAACCGCATATCCCACAATTCCATTCT GACACTGCCTAGAGTTAGCGCAGAACCCACAGGTTAGGGGCTCAGTCCCG CAAGACCACCCTCACTTCAGATGCCAGTTGCAAGTCCTAGGTTGTCACCT GTATTTTGACCAACCAGTTAGAAATCAGGGTTTCCCATGACCCTCTTCTT GAGTTTAGTTATTTACTAGAACAACTCACAGAACTTAGAAAA…	N/A	partly					7	EGF-like domain signature 1.	C-terminal cystine knot signature.	Anaphylatoxin domain signature.	Thiolases active site.	Tubulin subunits alpha, beta, and gamma signature.	VWFC domain signature.	2Fe-2S ferredoxin-type iron-sulfur binding region signature.
NOVEL1303	-1.47584	0.0477255	45.3043	coding	chr20:61,183,013-61,187,036	4024	CGCCTGGTCAAGCTCAGACCCAGGCAGAGAGGTGGCCGAGCCTCGCAGGGCCCCGGGTCCGACCCACCCCCGGGTCTGGCAGCTTTGCAGAAGGGCCTCTTTCAGGAAAGCAATTCACACACAATTCACAGTTGCAGCCTGCATGTCCTGTGTTGCTGTGGGCTCTGGAACTACGAGTGAGGACACCTTGAATCCCCTGTGCTTCCAGGATGTCACGTCTGTGTTCCTGGGACGGAGTGTGGAAACTGACTTTGGTAACTTCACGCTGCTTAGATGCACGGTGGGATCAGCTGCTGAGAGCAAATCTGATCGCCTCGTAGGTGAGCTCAGAGCTGCTAGGAAGCTCTTCACACCAGGGGCCTCAGGGGCACAGGTTTCGGGCCACGAGCTCACAGGCAT…	N/A	no	Full: C, R Partly M, D	13		Some H3K4me1 signal	11	EGF-like domain signature 1.	Integrins beta chain cysteine-rich domain signature.	C-terminal cystine knot signature.	Anaphylatoxin domain signature.	Insulin-like growth factor-binding protein (IGFBP) N-terminal domain signature.	Thiolases active site.	Tubulin subunits alpha, beta, and gamma signature.	VWFC domain signature.	4Fe-4S ferredoxin-type iron-sulfur binding region signature.	2Fe-2S ferredoxin-type iron-sulfur binding region signature.	Mammalian defensins signature.
NOVEL1115	-0.99831	0.0477255	11.3913	coding (weak)	chr2:97479230-97480108	879	GTTTTCCAAGTTTGATCCAATTGTTCTTCCACCTGAAGCTTTACTCCCAG AAAGTTAGTTATAGGTTGTTTTCCAAGGAAGCCTGAGACAAGGAAAAAGT AACCTGTTGAAGGTGAGAGCTCTGTCTCTAAATCCATGGGGAGTTTTTCC TGGCTTTTCTCTGGAACTGTTGTTTGTTAATGACTTTTCAGGCACATGAC TCATTTCAAGCATGTCATCCATTCTATTTCAATGTCAGTATTTTATCTTG ACGTGGAGACAGAAGTGAGAACTAAAGGAGCTGAATCTATTGTAATGTTT GCACTTTTTTTTTCTTCAGAGGCATGATGTTGCAGTGCAAAGGCCCAGTA ATGTCTTTATTGCTTCTGCTGGCGGCTTACTCTGTAATCTGC…	N/A	partly					6	EGF-like domain signature 1.	Thiolases active site.	Tubulin subunits alpha, beta, and gamma signature.	VWFC domain signature.	4Fe-4S ferredoxin-type iron-sulfur binding region signature.	2Fe-2S ferredoxin-type iron-sulfur binding region signature.
NOVEL2391	-0.945307	0.0477255	7.86957	noncoding (weak)	chrX:75412145-75413589	1445	ACATTTTCTCTATCAATTCATTTGTTGATGGACACTTAGGTTGCTTCCAA ATGTTACCTATTGTAAACAGTGCTGCAACAAACATAGGAGTGCAGGTATA TCCCTGATATACTGATTTCCTGTCTTTTGGGTATATACCCAGCAGTGGGA TTGCTGGATCATATGGTAACTCTATTTTTAGTTTTTTGAGGAACCACCAA ACTGTTCATAGTGGTTGTACTAATTTACATTTTAACCAACAGTATACAAG GGCTTCCTTTTCTCCACATTTTCACCAGCATTTGTTACTGCCTGTCTGTT GGATGTAAGACATTTTAACTGGGGTGAGATGGTATCTTACTGTACTTTTT ATTTGCATTTACCTTATGATCGATGATGTTGAGCACCTTTTC…	N/A	yes					2	Tubulin subunits alpha, beta, and gamma signature.	2Fe-2S ferredoxin-type iron-sulfur binding region signature.
NOVEL2097	-0.910307	0.0477255	23.087	coding (weak)	chr7:113,279,670-113,283,698	4029	ATGCTTATTAACTTGCATAGAATATTGCATGTACTTTGAACAAAAATCCTATGAATTGGATGTTATTATCTGCAGTTTACATAGGGAGAAACACACATACACAGGTTAAATAACATACTCAAATGTCCTCAGCAGGTAATAGTGGAACCTGAATATTAATTCAACAGTCAGACTCCAGGATATACATTTATAACCCCTGTGCTTCCAGAGGGTAAAAAAAGTGACTAAGTACTAACACAGATTCTTTTCTTCTCTATGTCAGGAGATGTGTATTAGTACATTTTCACACTGCTGATAAAGACATAACTGAGACTGGGAAGAAAAAGAGGTTTAATTGGACTTACAATTCCACATGGCTGGGGAGGCCTCAGAATCATAGCAGGAGGCAAAAGGCACTTC…	N/A	partly	Full: C, R Partly: M, Ra	14			5	EGF-like domain signature 1.	Anaphylatoxin domain signature.	Thiolases active site.	VWFC domain signature.	2Fe-2S ferredoxin-type iron-sulfur binding region signature.
NOVEL1908	-0.854448	0.0488113	10.5652	coding	chr6:99,312,552-99,314,806	2255	TAAAATGGATGCACCTAGAGCAGGAAATGAATAAGACTCTTGATTTTGCAAGGAATCTGTATAGATTGTAAAGCGGAAGGCACTTTGAAAGACAAAGGCAGAACCGTCCTCAATCTAAGTGTTTCTCTTTTCTGTGCACATGTCCAGACATACCCTGCTGACAGTGAGGATAACATATGATAGGGACACACATTGTAAATTCTTTCAATTTGACAAATATTTCTGATTATTAGGACTTAAGAACGTTTATTTTAGGTTTTACTGGATGGAGTTATTTTATGACTTTCAAATGAAGTTACTAGGGCTTCAACAATATTGACTCTATGCGGGTTATCTGTCAGCAAAAAACATATCAAGTAAGAAGAATGGTGTGTCAGAATTTATGTTAGTATTAACAGT…	N/A	partly	Full: C Partly: R, M, Ra, D	5	Not enhancer-like		2	Thiolases active site.	2Fe-2S ferredoxin-type iron-sulfur binding region signature.
										C=Chimp, R=Rhesus, M=Mouse, Ra=Rat, D=Dog
